# Supplementary material for: Biofilm heterogeneity-adaptive photoredox catalysis enables red light-triggered nitric oxide release for combating drug-resistant infections
Source: PubMed Central journal article supplement (PMC10657346; doi:10.1038/s41467-023-43415-8), 2023-11-18
Supplement: 41467_2023_43415_MOESM3_ESM.pdf [file 41467_2023_43415_MOESM3_ESM.pdf]

## Description of Additional Supplementary Files

**File Name:** Supplementary Data 1

**Description:** Atomic cartesian coordinates of intermediates and transition states in the most favored path (Å).
